# Supplementary material for: Discovery and Genomic Characterization of a Novel Ovine Partetravirus and a New Genotype of Bovine Partetravirus
Source: PubMed Central journal article supplement (PMC3181347; doi:10.1371/journal.pone.0025619), 2011-09-27
Supplement: pone.0025619.s001.pdf [file pone.0025619.s001.pdf]

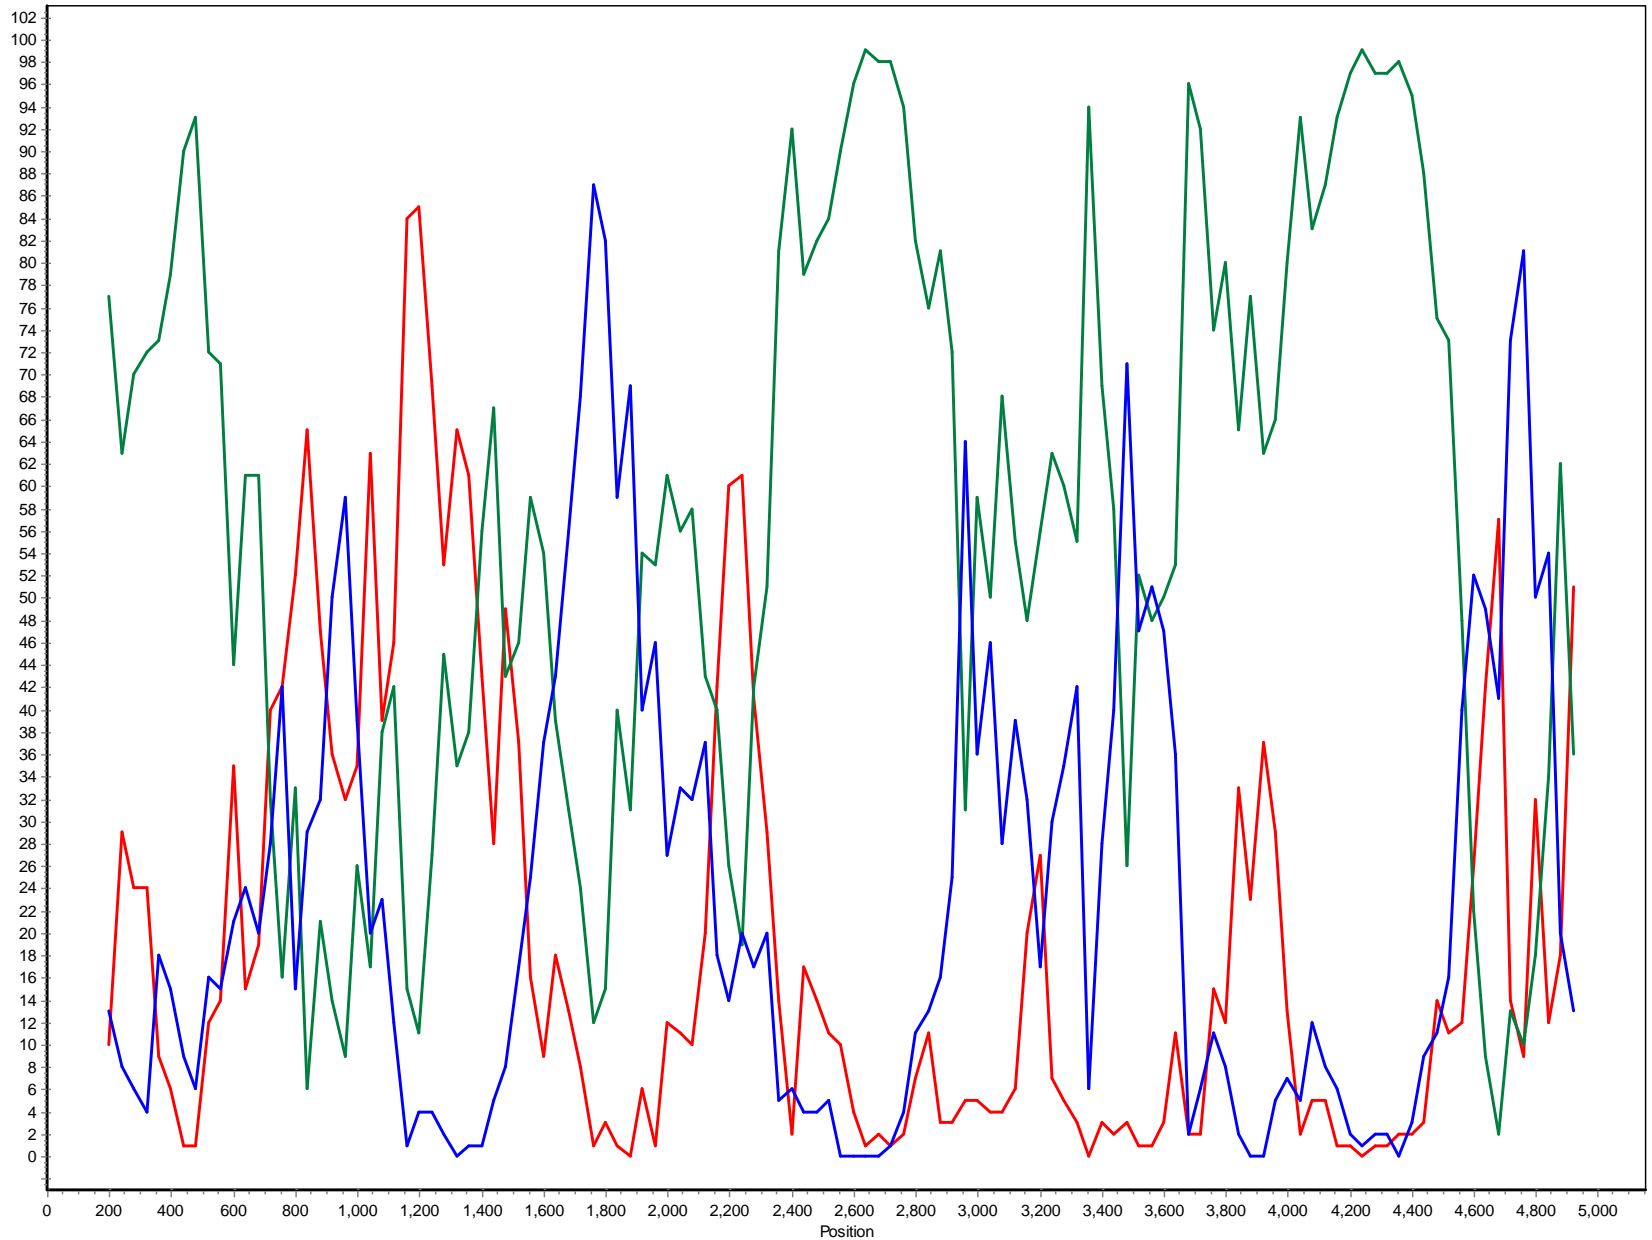

P  
B  
H

Window: 400 bp, Step: 40 bp, GapStrip: On, Reps: 100, Kimura (2-parameter), T/t: Variable, Neighbor-Joining
